# Supplementary material
Source: HighWire-hosted journal article supplement (https://www.highwirestage.com/highwire/filestream/72275/field_highwire_adjunct_files/0/19-00829.pdf)
Supplement: 19-00829.pdf [file 19-00829.pdf]

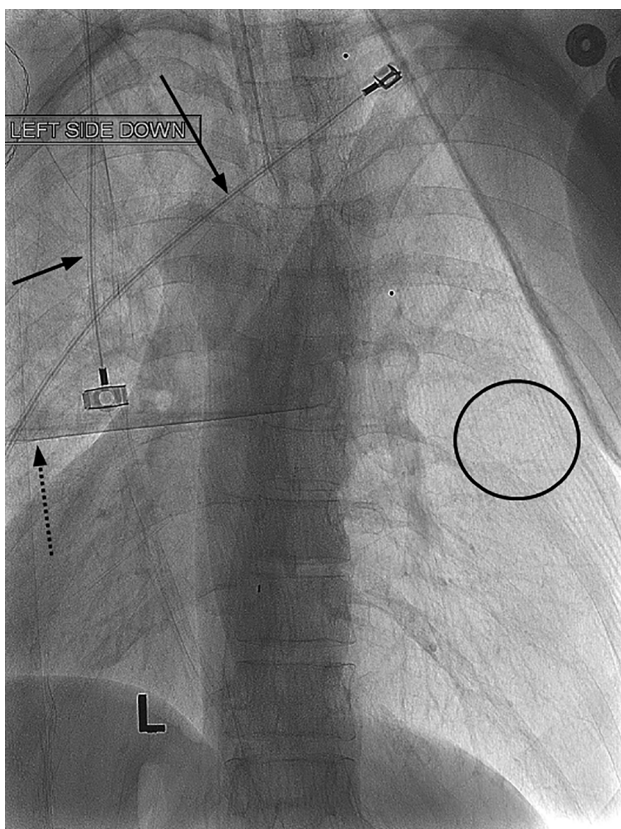

**ON-LINE FIGURE.** Artifacts from superimposed objects. Note the various monitoring leads (*solid arrows*), crease in the sterile drape (*dotted arrow*), and texture from the blanket (*circle*), creating various overlying shadows that degrade the image quality.
